# Supplementary material
Source: PubMed Central journal article supplement (PMC5749250)

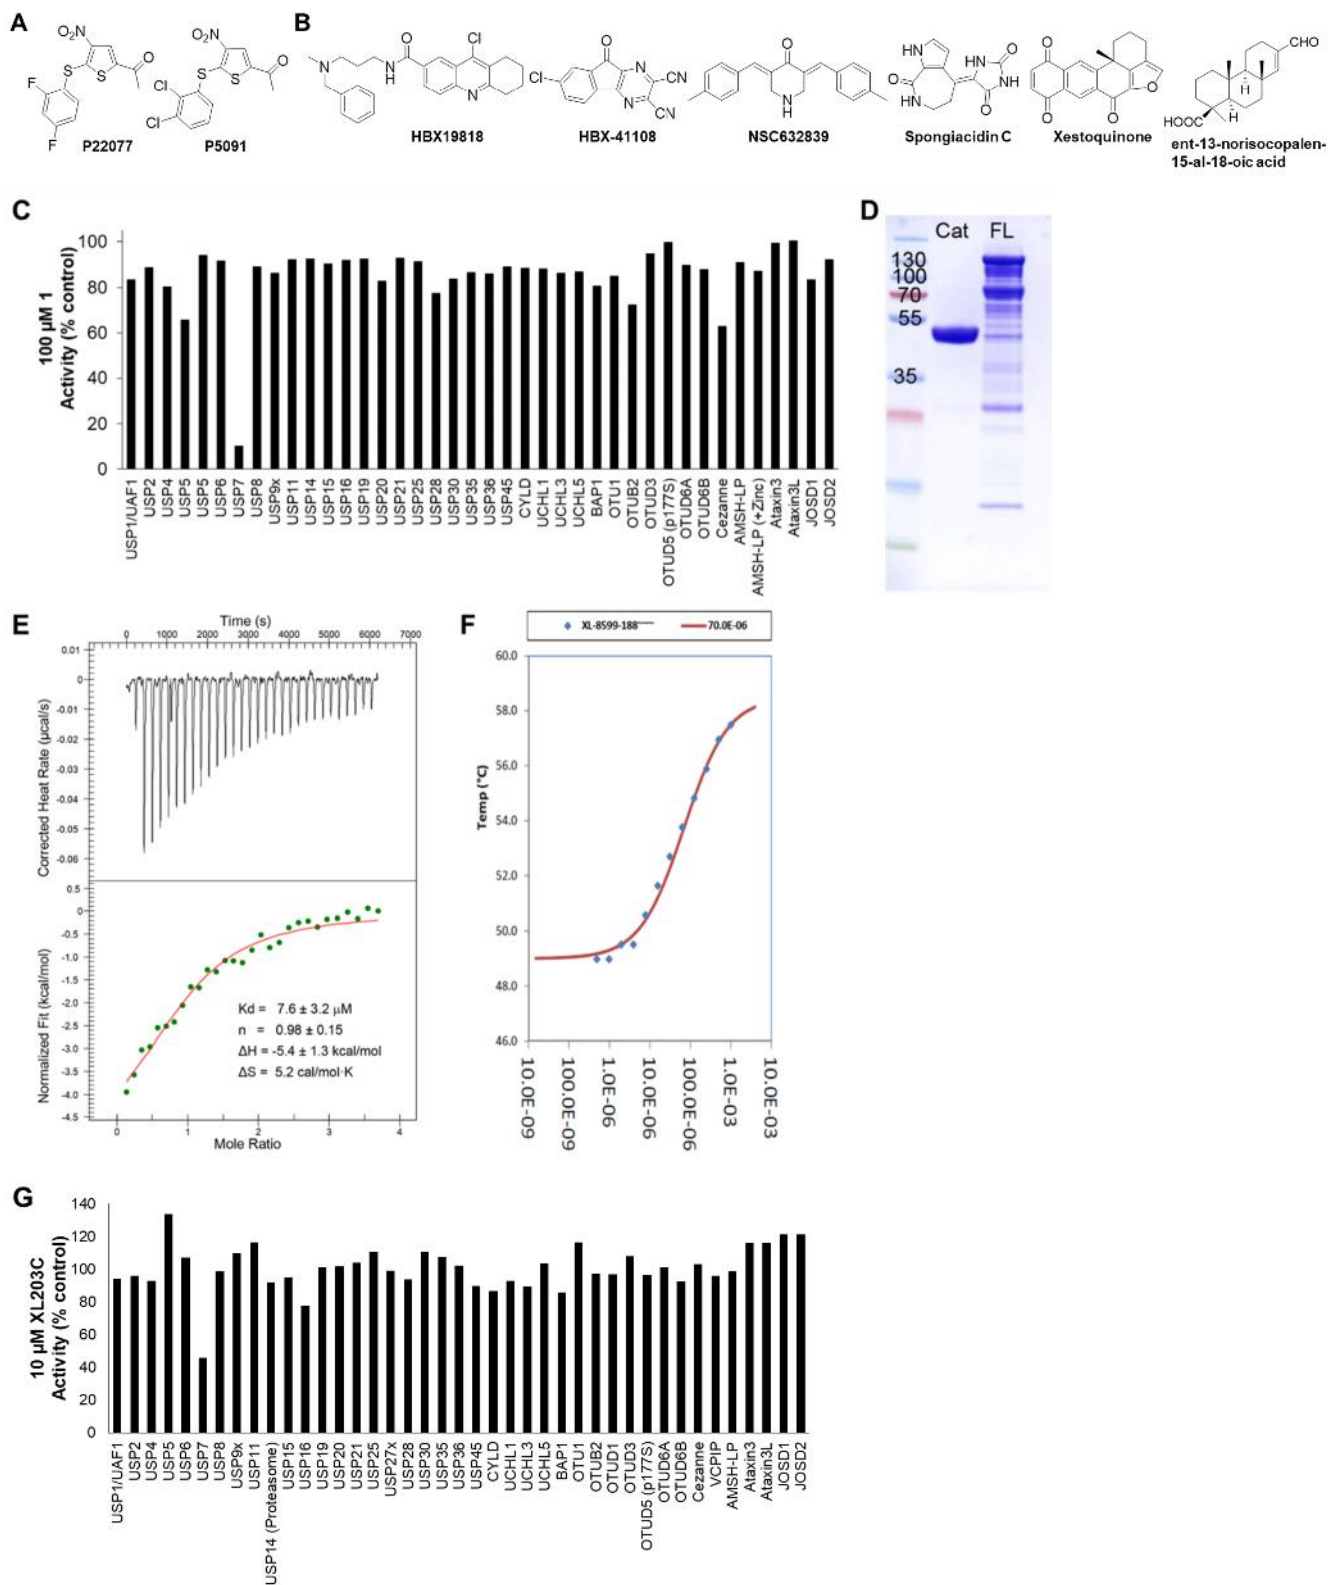

**Figure S1. Structure and characterization of USP7 inhibitors. Related to Figure 1.** A) USP7 inhibitors P22077 and P5091. B) Reported USP7 inhibitors. C) Inhibitory activity of **1**, at a concentration of 100  $\mu\text{M}$ , across a panel of 38 purified DUBs using Ub-Rho as substrate. D) Assessment of **1** binding to USP7 using ITC. E) Measure of ability of XL188 to bind USP7 using differential scanning fluorimetry. F) Inhibitory activity of XL203C across a panel of 41 purified DUBs using Ub-Rho as substrate. G) Coomassie gel with USP7 catalytic domain (Cat) and full-length (FL) proteins.

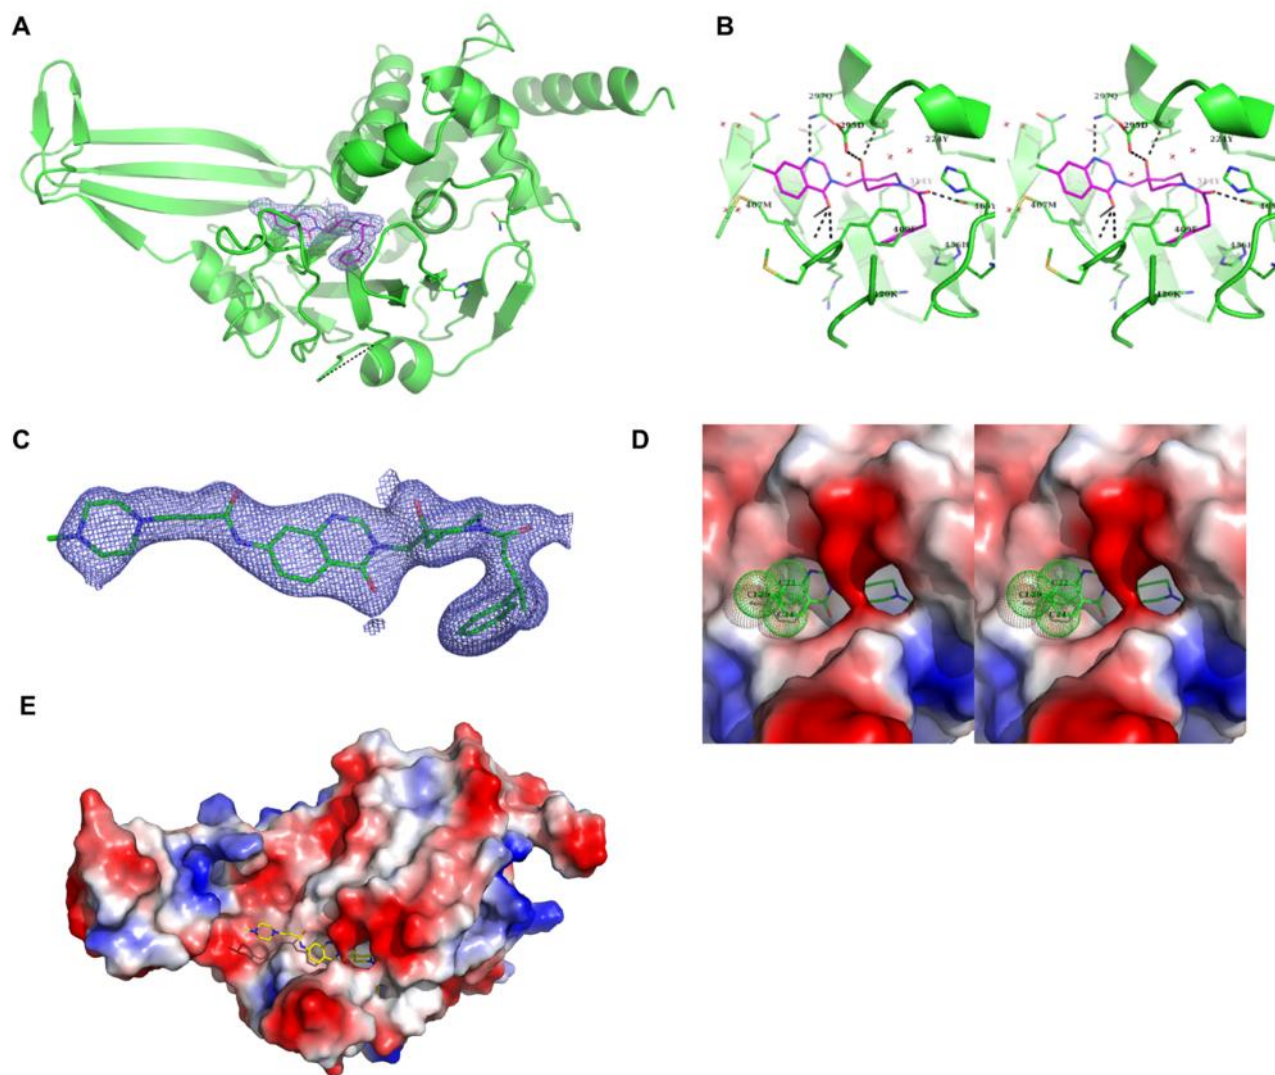

**Figure S2. Crystallographic characterization of binding of 1 and XL188 to USP7. Related to Figure 2.** A) Ribbon diagram of USP7 with 1. B) Stereo view of the detailed interactions between 1 and USP7. C) Electron density map of XL188 bound to USP7. D) Molecular surface representation of 1 bound to USP7 zoomed in to the compound binding pocket. E) Molecular surface representation of XL188 bound to USP7.

**A**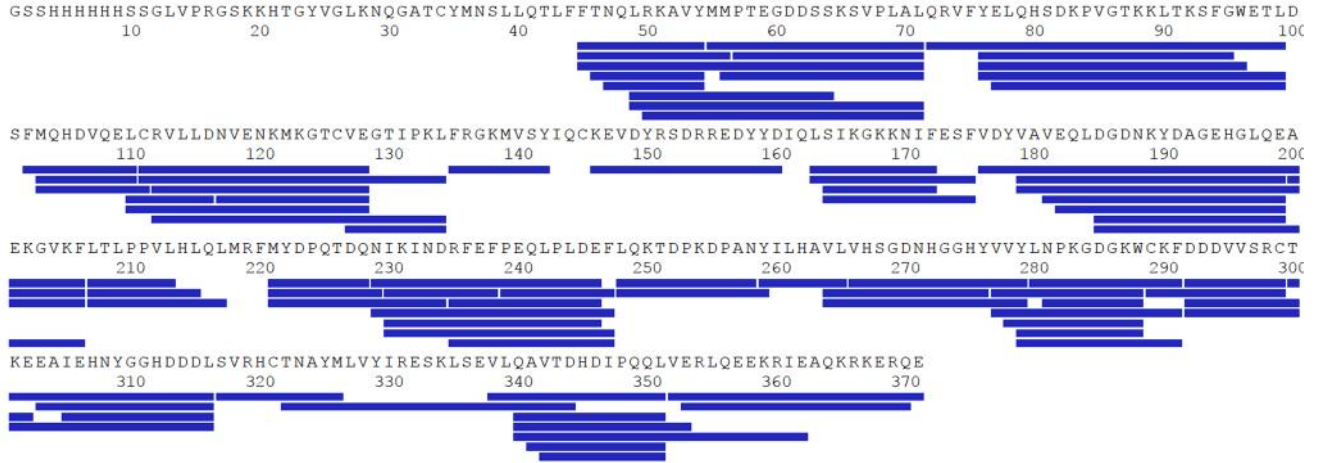

Total: 85 Peptides, 85.4% Coverage, 3.95 Redundancy

**B**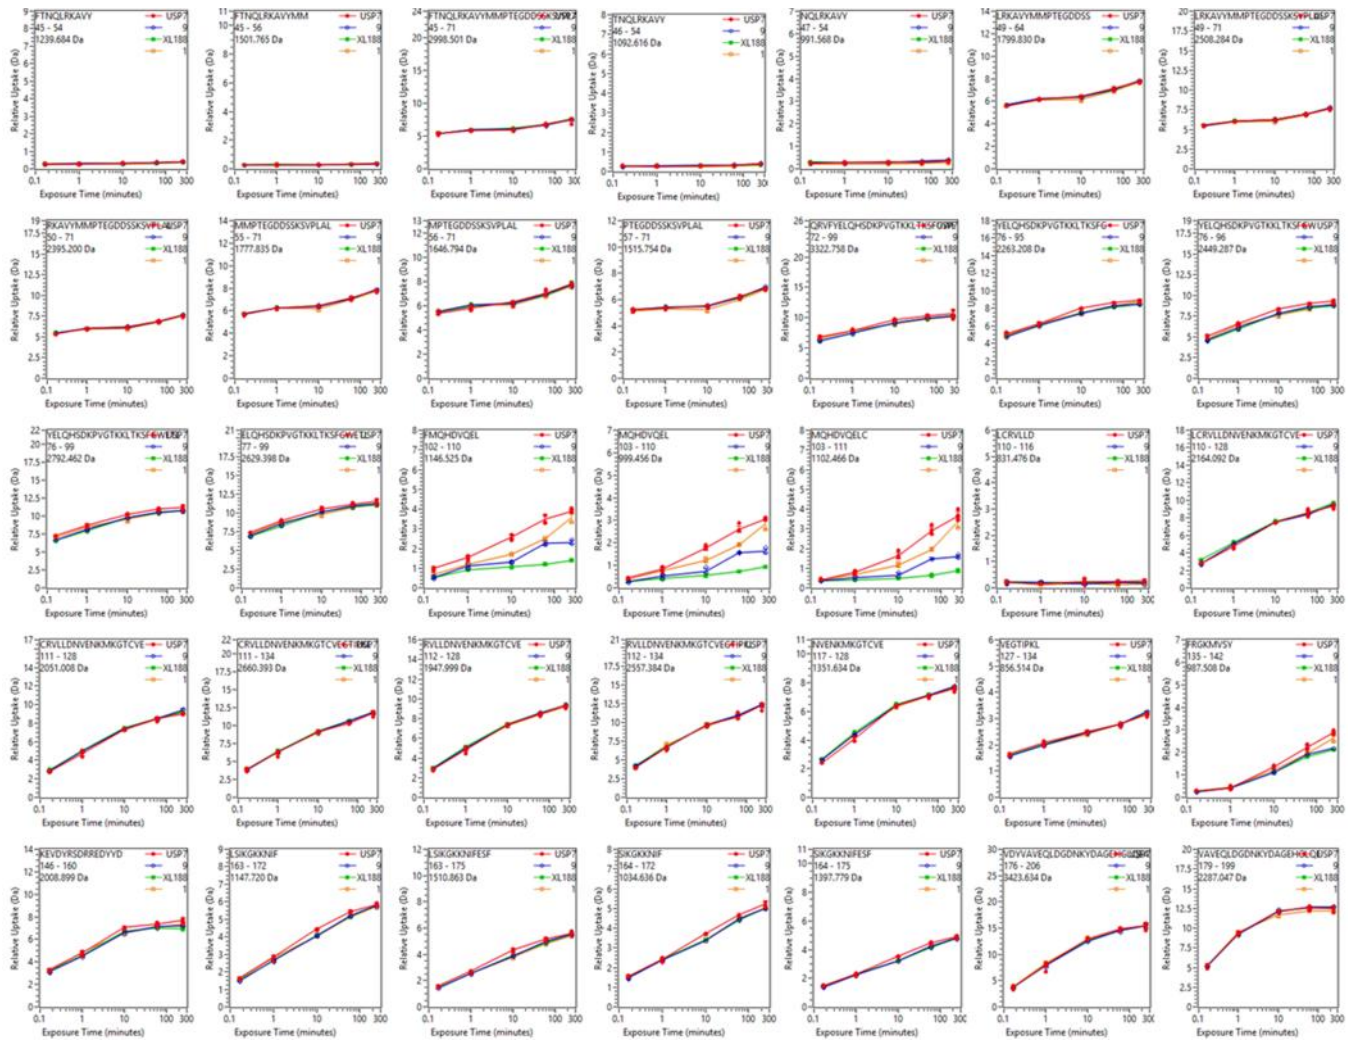





C

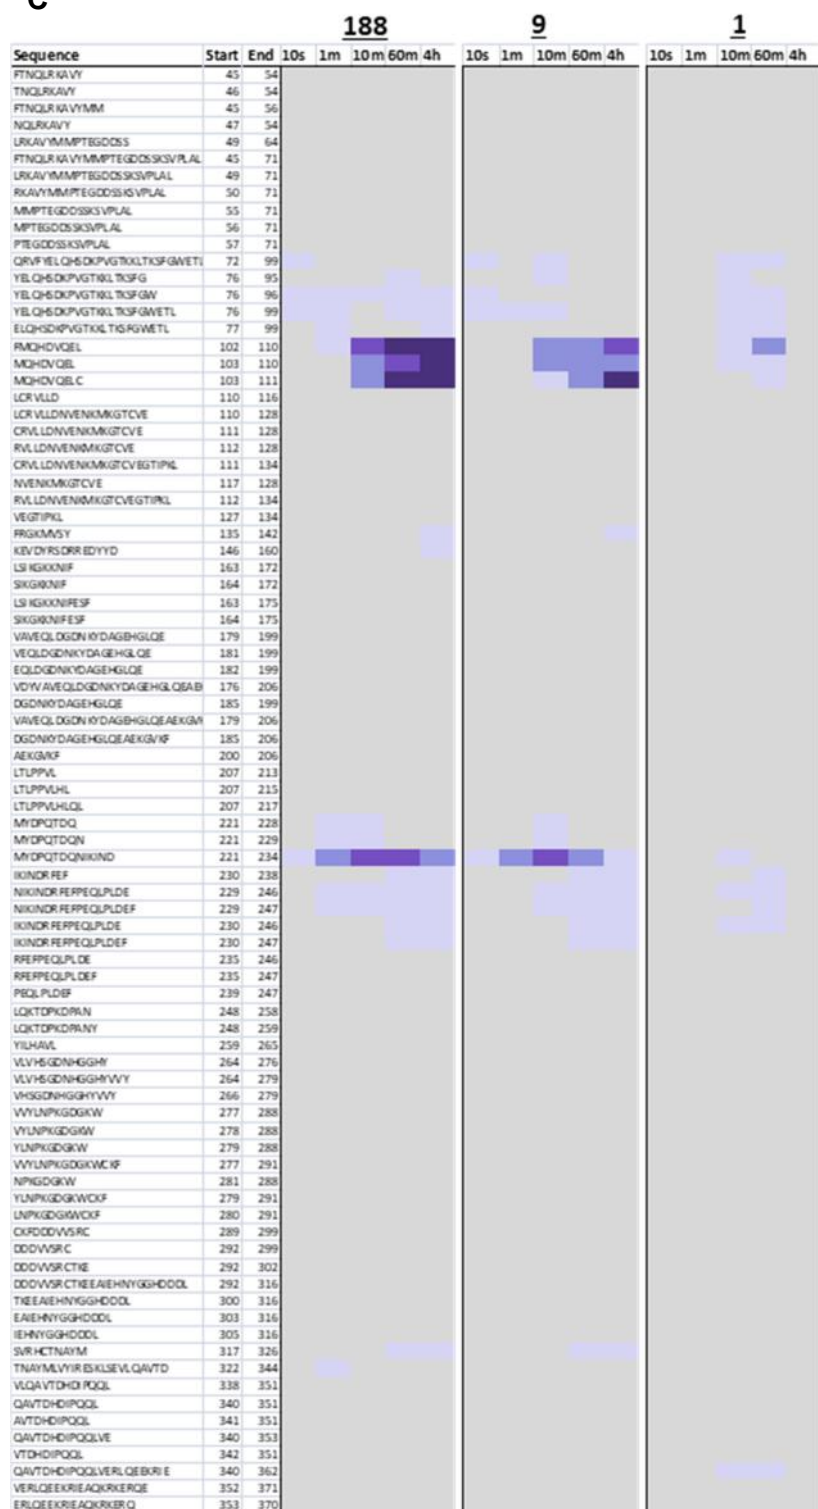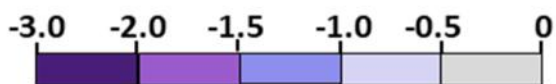

Maximal difference in deuteration (in Da):  
USP7-bound form vs. free USP7

**Figure S3. Analysis of inhibitor binding by HDX MS. Related to Figure 2.** A) The peptic map of USP7 catalytic domain showing all the peptic peptides (blue lines under the sequence) that were followed with HDX MS under all states investigated: free and individually bound to the compounds. B) Deuterium incorporation graphs for all the peptic peptides shown in A. The maximum of the y axis in each graph is the maximum amount of deuterium that could be incorporated in each peptide. Because these experiments were done as comparisons under identical experimental conditions, no corrections have been made for back-exchange thus the absolute value of each deuterium level is 20–30% higher than plotted based on totally deuterated standards. (Wales and Engen, 2006) C) Chiclet representation of the HDX MS data. The peptides from panel A and B are represented from N to C terminus (top to bottom) at each time point (left to right). The deuterium level for each bound state was subtracted from that of the protein alone and colored according to the legend shown.



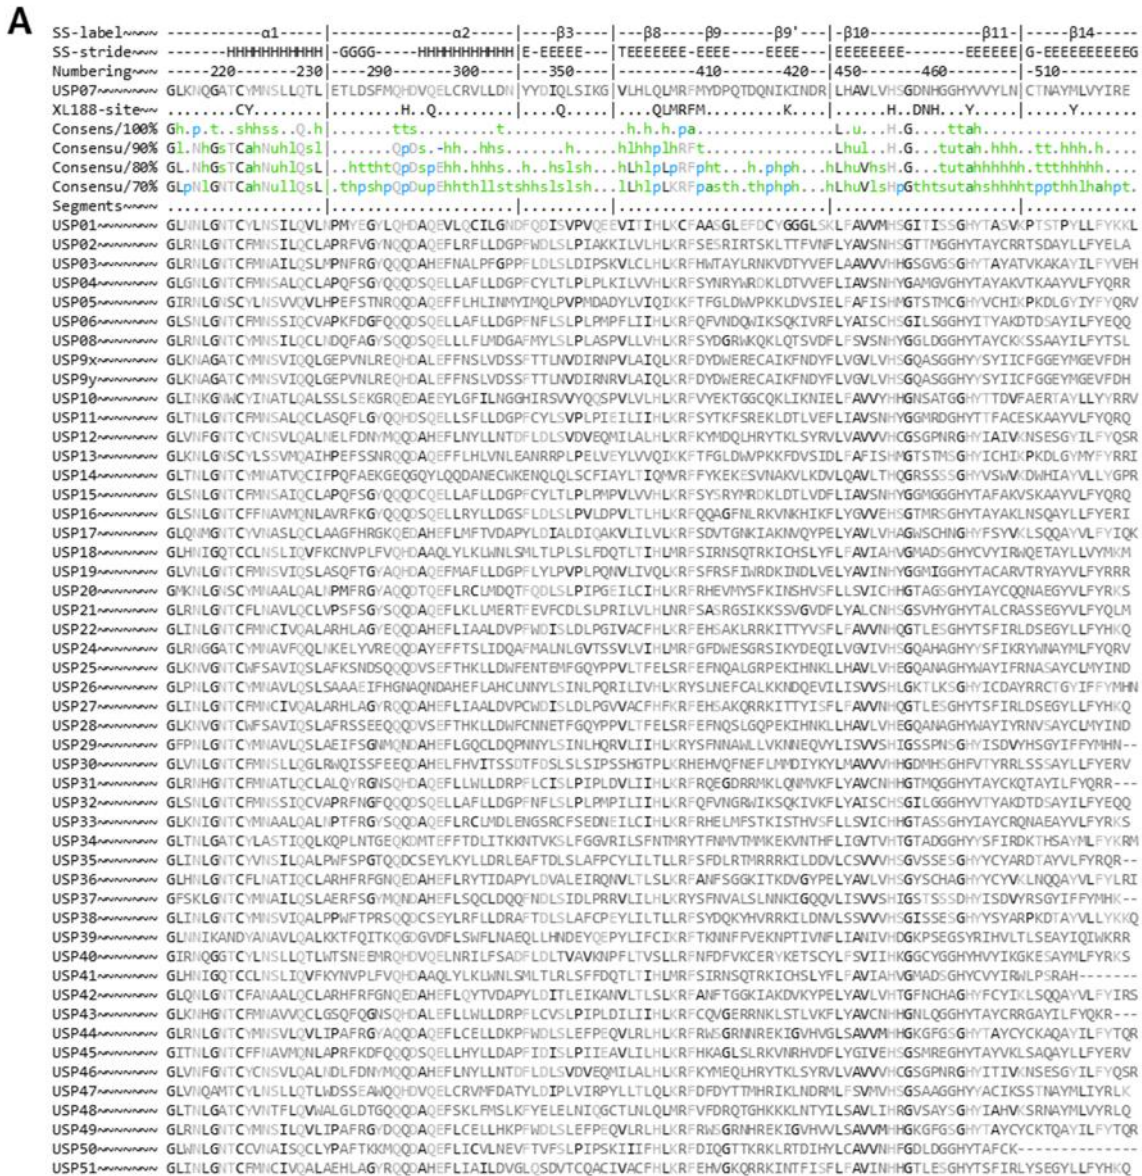

Multiple sequence alignment of human catalytic USP domains, showing only the XL188-binding segments. Conserved residues are shaded according to MView. (Brown et al., 1998) Secondary structures are labeled and marked (H=helix, E=strand, G=H10 helix). Numbering corresponds to that of USP7. Residues that make direct contact with XL188 are shown (XL188-site). The 70-100% consensus lines according to MView are shown.

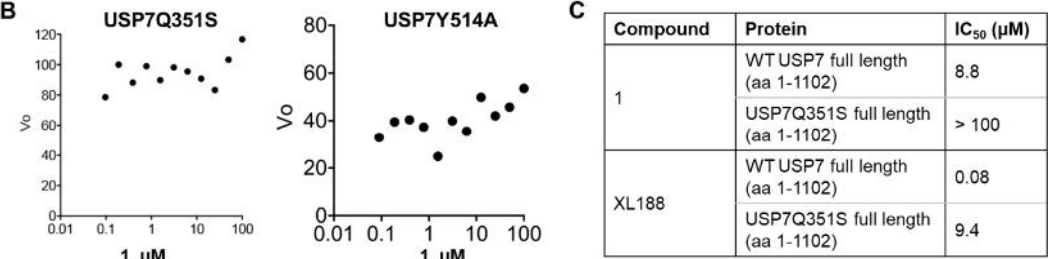

**Figure S4. USP family sequence alignment and analysis of mutant USP7 enzymes. Related to Figure 3.** A) Alignment of 52 USP family DUBs with USP7 using MView. B) Dose-response inhibition of USP7Q351S and USP7Y514A catalytic domains (amino acids 208-560) by **1**. C) Summary of inhibition of full-length USP7 and USP7Q351S by **1** and XL188.

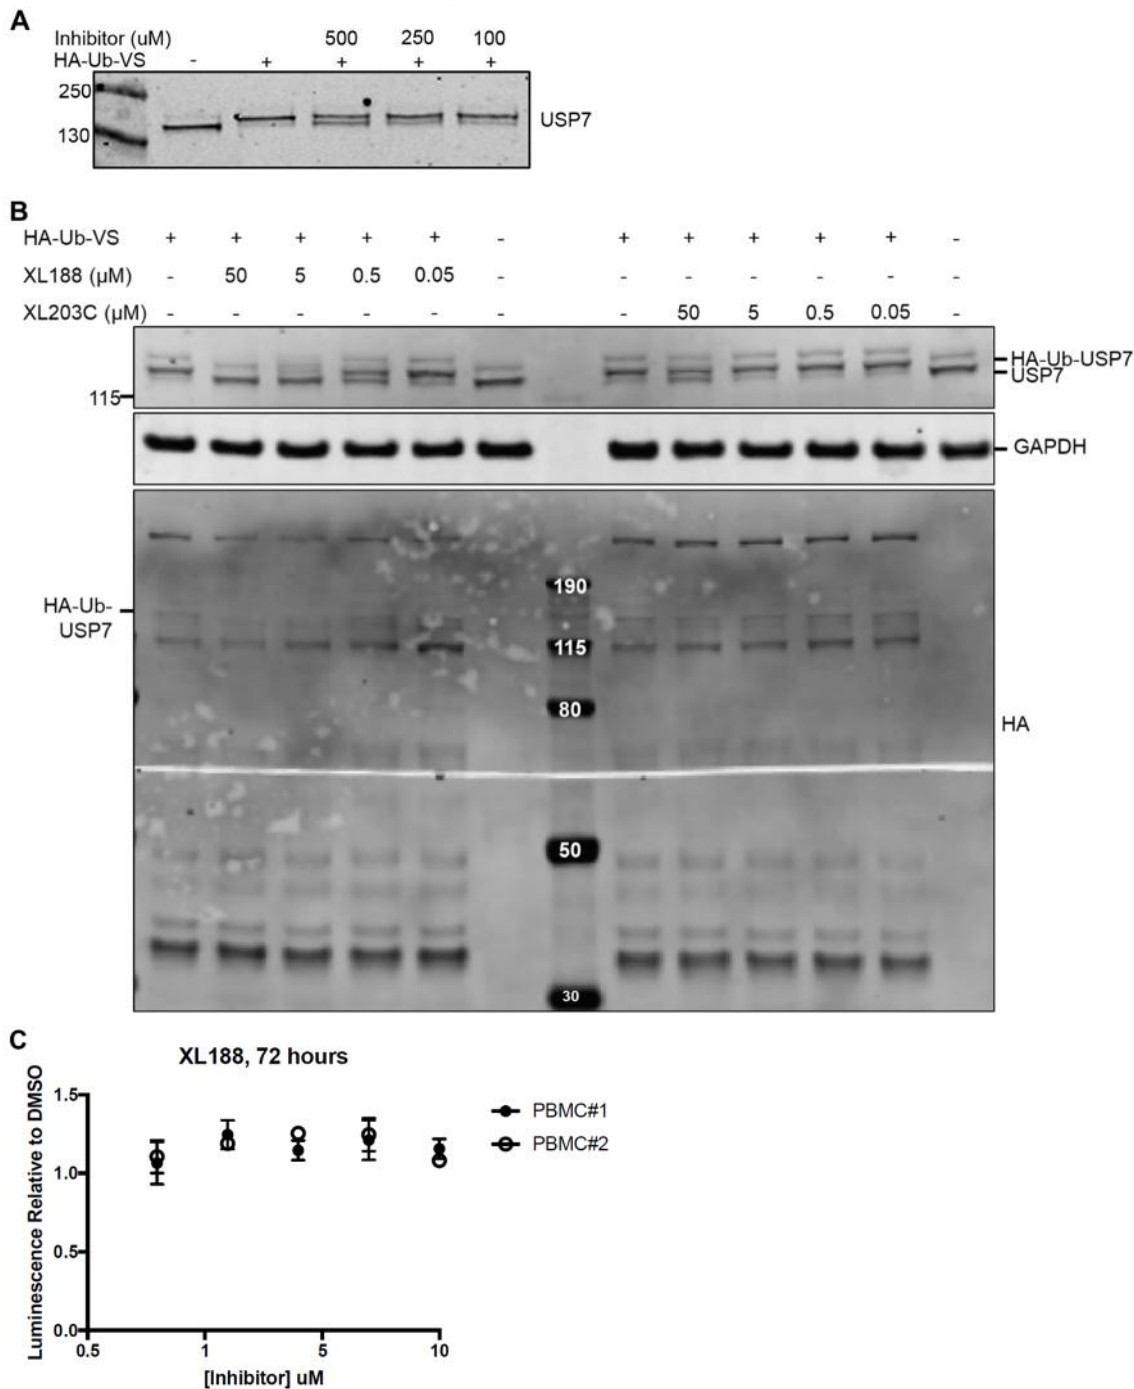

**Figure S5. Characterization of 1, XL188, and XL203C. Related to Figure 4.** A) Analysis of the ability of 1 to bind native USP7 in HEK293T lysates using competitive activity based protein profiling. B) Analysis of the ability of XL188 and XL203C to compete for labeling of DUBs by the DUB activity based probe HA-Ub-Vs. The USP7 blot is the same as appears in Figure 4C. A broad assessment of DUB inhibitory activity in lysates was conducted by blotting for HA. C) Analysis of the growth suppressive effects of XL188 on peripheral bone mononuclear cells (PBMCs).



## Supplemental Tables

**Table S1. Analysis of the inhibitory activity of compounds versus a panel of purified DUBs. Related to Figure 1D, S1C and S1G. \*% Control = ((sample - mean no enzyme)/(mean plus enzyme - mean no enzyme))\*100**

| DUB                             | Activity (% control)* |                  |                   |
|---------------------------------|-----------------------|------------------|-------------------|
|                                 | 100 $\mu$ M 1         | 10 $\mu$ M XL188 | 10 $\mu$ M XL203C |
| USP1/UAF1                       | 83                    | 94               | 94                |
| USP2                            | 89                    | 93               | 96                |
| USP4                            | 80                    | 89               | 93                |
| USP5                            | 66                    | 126              | 134               |
| USP6                            | 92                    | 111              | 107               |
| USP7                            | 10                    | 1                | 46                |
| USP8                            | 89                    | 99               | 99                |
| USP9x                           | 86                    | 123              | 110               |
| USP11                           | 92                    | 119              | 116               |
| USP14<br>(Proteasome-<br>VS@Kd) | 93                    | 98               | 92                |
| USP15                           | 90                    | 95               | 95                |
| USP16                           | 92                    | 88               | 78                |
| USP19                           | 92                    | 107              | 101               |
| USP20                           | 83                    | 124              | 102               |
| USP21                           | 93                    | 115              | 104               |
| USP25                           | 91                    | 132              | 111               |
| USP27x                          | not tested            | 102              | 99                |
| USP28                           | 78                    | 111              | 94                |
| USP30                           | 84                    | 110              | 110               |
| USP35                           | 86                    | 107              | 108               |
| USP36                           | 86                    | 107              | 102               |
| USP45                           | 89                    | 113              | 90                |
| CYLD                            | 89                    | 96               | 87                |
| UCHL1                           | 88                    | 106              | 93                |
| UCHL3                           | 86                    | 101              | 89                |
| UCHL5                           | 87                    | 97               | 104               |
| BAP1                            | 81                    | 89               | 86                |
| OTU1                            | 85                    | 107              | 116               |
| OTUB2                           | 72                    | 87               | 97                |
| OTUD1                           | not tested            | 96               | 97                |
| OTUD3                           | 95                    | 97               | 108               |
| OTUD5 (p177S)                   | 100                   | 101              | 97                |
| OTUD6A                          | 90                    | 112              | 101               |
| OTUD6B                          | 88                    | 81               | 92                |
| Cezanne                         | 63                    | 100              | 103               |
| VCIPIP                          | not tested            | 100              | 96                |
| AMSH-LP                         | 91                    | 97               | 99                |
| Ataxin3                         | 99                    | 111              | 116               |
| Ataxin3L                        | 100                   | 109              | 116               |
| JOSD1                           | 83                    | 108              | 121               |
| JOSD2                           | 92                    | 126              | 121               |

**Table S2. ITC data for selected compounds. Related to Figure 1C, S1E.**

| Ligand       | Kd ( $\mu\text{M}$ ) |       |        | DH (kcal/mol) |       |     | n (stoichiometry) |       |      | DS (cal/mol-K) |
|--------------|----------------------|-------|--------|---------------|-------|-----|-------------------|-------|------|----------------|
|              |                      | $\pm$ |        |               | $\pm$ |     |                   | $\pm$ |      |                |
| <b>XL188</b> | 0.104                | $\pm$ | 0.015  | -15.1         | $\pm$ | 0.1 | 1.06              | $\pm$ | 0.01 | 119.6          |
| <b>1</b>     | 7.614                | $\pm$ | 3.216  | -5.4          | $\pm$ | 1.3 | 0.98              | $\pm$ | 0.15 | 5.3            |
| <b>7</b>     | No binding detected  |       |        |               |       |     |                   |       |      |                |
| <b>8</b>     | 1.838                | $\pm$ | 0.895  | -3.9          | $\pm$ | 0.2 | 2.46              | $\pm$ | 0.09 | 13.1           |
| <b>9</b>     | 0.797                | $\pm$ | -0.097 | -13.5         | $\pm$ | 0.3 | 0.96              | $\pm$ | 0.01 | -17.3          |

**Table S3. Crystallization conditions and data collection and refinement statistics for crystal structures. Related to Figure 2A-B, S2.**

|                                                     |                                                                   |                                                 |                                                                             |
|-----------------------------------------------------|-------------------------------------------------------------------|-------------------------------------------------|-----------------------------------------------------------------------------|
| <b>Structure Name</b>                               | XL188                                                             | 8                                               | 1                                                                           |
| <b>Ligand</b>                                       | XL188                                                             | 8                                               | 1                                                                           |
| <b>RCSB accession code</b>                          | 5VS6                                                              | 5VSK                                            | 5VSB                                                                        |
| <b>Data collection <sup>a</sup></b>                 |                                                                   |                                                 |                                                                             |
| Space group                                         | P2 <sub>1</sub>                                                   | P2 <sub>1</sub>                                 | P2 <sub>1</sub>                                                             |
| Cell dimensions                                     |                                                                   |                                                 |                                                                             |
| <i>a, b, c</i> (Å)                                  | 75.8 68.52 80.31                                                  | 72.39 69.63 77.97                               | 61.97 73.74 84.77                                                           |
| <i>a, b, g</i> (°)                                  | 90.00 96.17 90.00                                                 | 90.00 99.16 90.00                               | 90.00 91.43 90.00                                                           |
| Resolution (Å)                                      | 52.00-2.27 (2.35-2.27) <sup>b</sup>                               | 44.15-3.33 (3.45-3.33)                          | 73.74-1.85 (1.90-1.85)                                                      |
| <i>R</i> <sub>pin</sub>                             | 0.078 (0.584)                                                     | 0.038 (0.449)                                   | 0.058 (0.824)                                                               |
| <i>I</i> / <i>s</i> /                               | 11.00 (1.59)                                                      | 13.57 (1.94)                                    | 8.90 (1.10)                                                                 |
| Completeness (%)                                    | 99.4 (99.3)                                                       | 98.4 (98.2)                                     | 99.7 (99.3)                                                                 |
| Redundancy                                          | 3.7 (3.7)                                                         | 3.4 (3.4)                                       | 3.6 (3.2)                                                                   |
| <b>Structure solution</b>                           |                                                                   |                                                 |                                                                             |
| PDB entries used for molecular replacement          | 1NB8                                                              | 1NB8                                            | 1NB8                                                                        |
| <b>Refinement</b>                                   |                                                                   |                                                 |                                                                             |
| Resolution (Å)                                      | 52.00-2.27                                                        | 44.15-3.33                                      | 73.74-1.85                                                                  |
| No. reflections                                     | 37813                                                             | 11217                                           | 64979                                                                       |
| <i>R</i> <sub>work</sub> / <i>R</i> <sub>free</sub> | 0.1817/0.2321                                                     | 0.2183/0.2734                                   | 0.2282/0.2484                                                               |
| No. atoms                                           | 5740                                                              | 4630                                            | 5726                                                                        |
| Protein                                             | 5356                                                              | 4563                                            | 5294                                                                        |
| Ligand/ion                                          | 98                                                                | 66                                              | 60                                                                          |
| Water                                               | 286                                                               | 1                                               | 372                                                                         |
| <b><i>B</i>-factors</b>                             |                                                                   |                                                 |                                                                             |
| Protein                                             | 46.1                                                              | 121.07                                          | 38.3                                                                        |
| Ligand/ion                                          | 50.2                                                              | 142.76                                          | 26.2                                                                        |
| Water                                               | 45.7                                                              | 118.39                                          | 42.9                                                                        |
| <b>R.m.s. deviations</b>                            |                                                                   |                                                 |                                                                             |
| Bond lengths (Å)                                    | 0.007                                                             | 0.002                                           | 0.133                                                                       |
| Bond angles (°)                                     | 0.86                                                              | 0.49                                            | 2.71                                                                        |
| <b>Ramachandran Plot<sup>e</sup></b>                |                                                                   |                                                 |                                                                             |
| Preferred                                           | 96.1%                                                             | 94.0%                                           | 93.8%                                                                       |
| Allowed                                             | 3.6%                                                              | 5.5%                                            | 5.5%                                                                        |
| Not Allowed                                         | 0.3%                                                              | 0.5%                                            | 0.8%                                                                        |
| <b>Crystallization condition</b>                    | 0.1M Tris pH 8.5, 0.2M sodium acetate, 10mM DTT, 30% w/v PEG 4000 | 0.1M Hepes pH 7.8, 10mM DTT, 22.8% w/v PEG 8000 | 0.1M sodium citrate pH 5.5, 0.2M sodium formate, 10mM DTT, 36% w/v PEG 3350 |



**Table S4. Primers used in generation of USP7 proteins. Related to Figure 1, 3 and S4.**

| <b>USP7 protein</b> | <b>primer</b>                                         |         |
|---------------------|-------------------------------------------------------|---------|
| USP7 208-560        | GTTCCGCGTGGTAGTAAGAAGCACACAGGCTACGTC                  | forward |
|                     | CAAGCTTCGTCATCATTCCTGCCGCTCCTTCCGC                    | reverse |
| USP7 1-1102         | AGGAGATATACCATGAACCACCAGCAGCAGCAG                     | forward |
|                     | GGTGGTGGTGCTCGAGGTTATGGATTTTAATGGCCTT                 | reverse |
| <b>USP7 mutant</b>  | <b>primer</b>                                         |         |
| Q351S               | GAAGATTATTATGATATCTCGCTAAGTATCAAAGG                   | forward |
|                     | CCTTTGATACTTAGCGAGATATCATAATAATCTTC                   | reverse |
| M407K               | CCAGTGTTACATCTACAACCTGAAGAGATTTATGTATGACCC            | forward |
|                     | GGGTCATACATAAAATCTCTTCAGTTGTAGATGTAACACTGG            | reverse |
| M410S               | CTACAACCTGATGAGATTTAGTTATGACCCTCAGACGGACC             | forward |
|                     | GGTCCGTCTGAGGGTCATAACTAAATCTCATCAGTTGTAG              | reverse |
| M407K/M410S         | CCAGTGTTACATCTACAACCTGAAGAGATTTAGTTATGACCCTCAGACGGACC | forward |
|                     | GGTCCGTCTGAGGGTCATAACTAAATCTCTTCAGTTGTAGATGTAACACTGG  | reverse |
| K420A               | CCCTCAGACGGACCAAAATATCGCGATCAATGATAGGTTTGAATTCC       | forward |
|                     | GGAATTCAAACCTATCATTGATCGCGATATTTTGGTCCGTCTGAGGG       | reverse |
| H456A               | CTTCATGCAGTCCTGGTTGCTAGTGGAGATAATCATGGTGG             | forward |
|                     | CCACCATGATTATCTCCACTAGCAACCAGGACTGCATGAAG             | reverse |
| H461A               | CTGGTTCATAGTGGAGATAATGCTGGTGGACATTATGTGG              | forward |
|                     | CCACATAATGTCCACCAGCATTATCTCCACTATGAACCAG              | reverse |
| Y514A               | CGACACTGCACCTAATGCTGCCATGTTAGTCTACATCAGGG             | forward |
|                     | CCCTGATGTAGACTAACATGGCAGCATTAGTGCAGTGTCC              | reverse |
|                     |                                                       |         |

# NMR spectra

XL\_8599\_157D\_Product\_1  
PI Last Name Buhlage

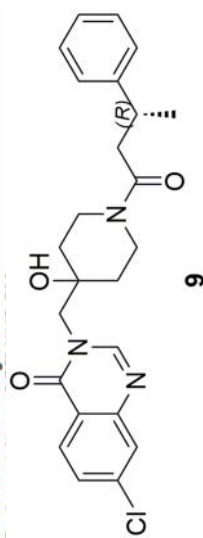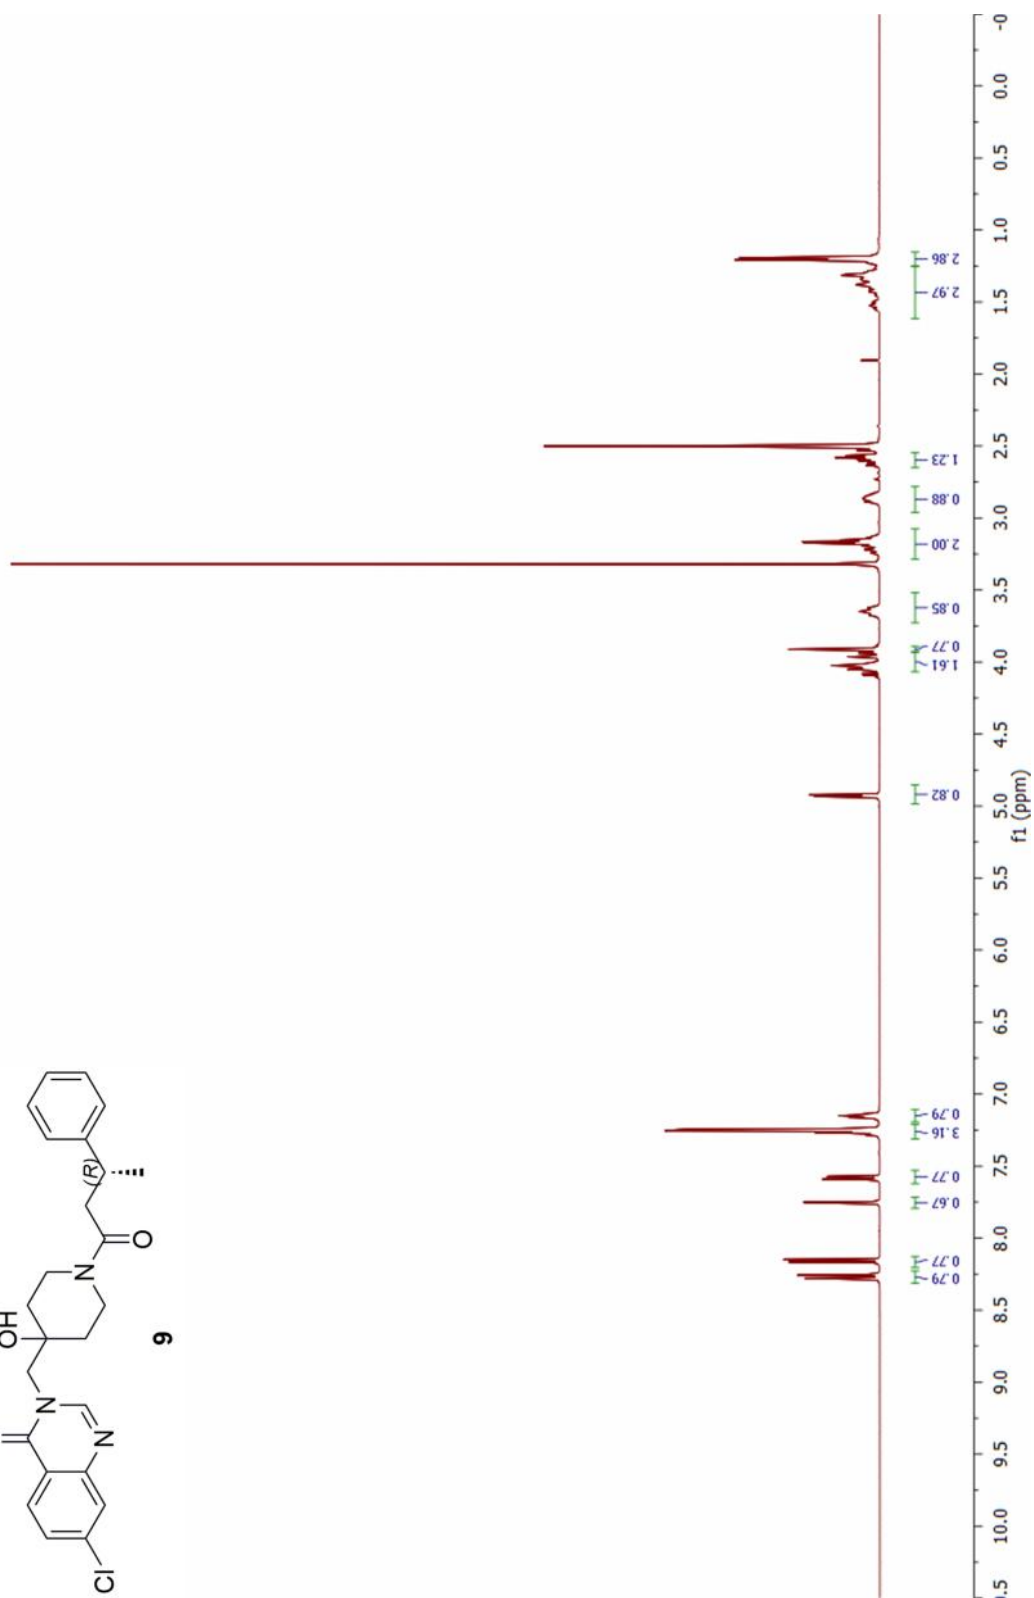

XL\_8599\_157D\_Product\_13C  
PI Last Name Buhrlage

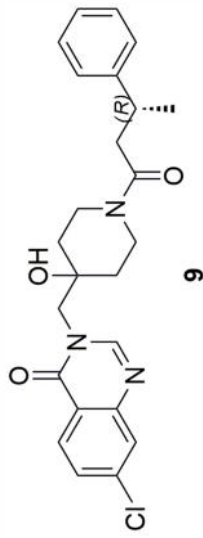

53.58  
40.82  
39.99  
36.68  
36.01  
35.78  
34.65  
34.09  
33.85  
21.83  
21.63

69.05  
69.00

168.92  
159.90  
150.16  
148.76  
146.43  
146.31  
138.70  
128.22  
127.99  
127.96  
126.98  
126.68  
126.64  
125.99  
125.74  
125.69  
120.12

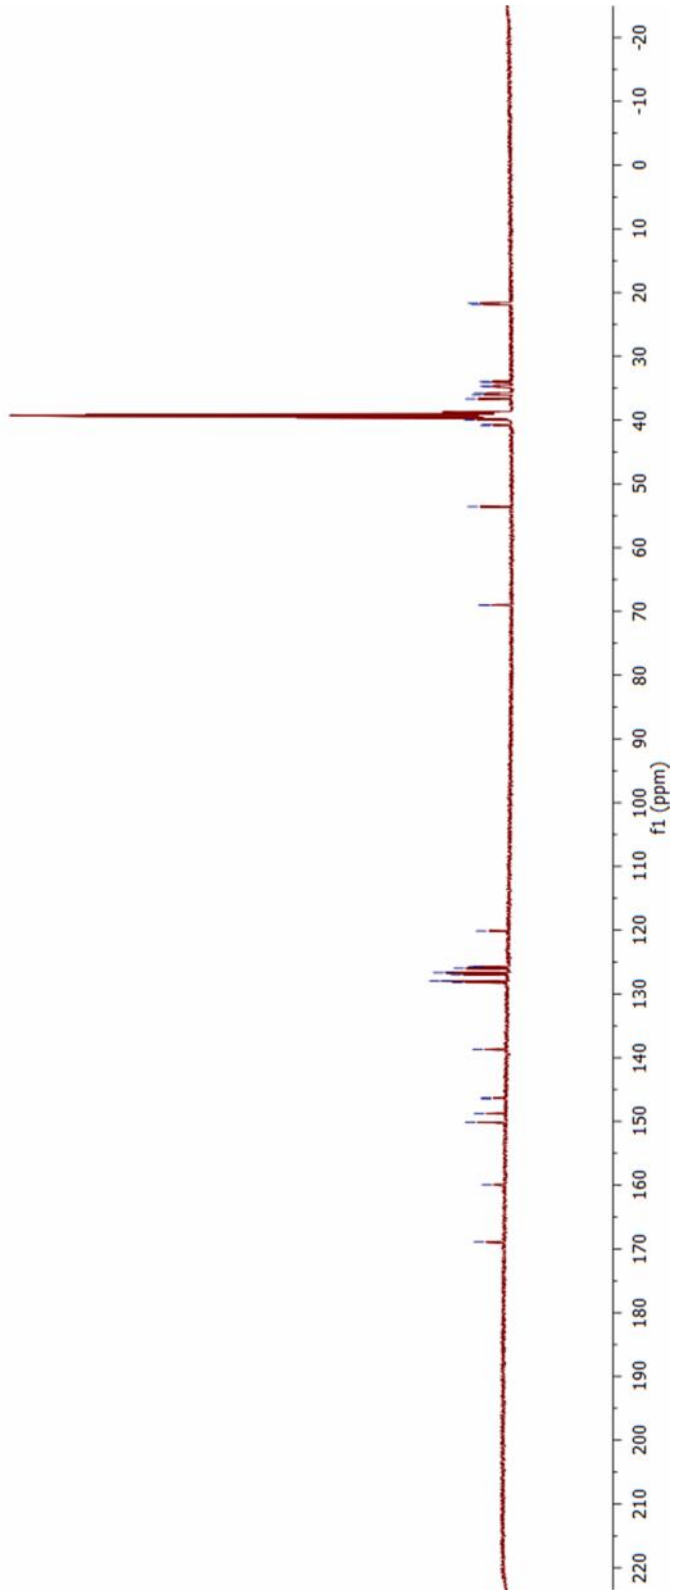



XL\_8599\_157L\_Product  
PI Last Name Buhrlage

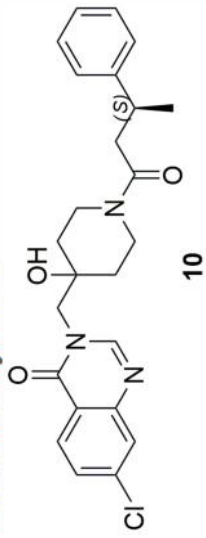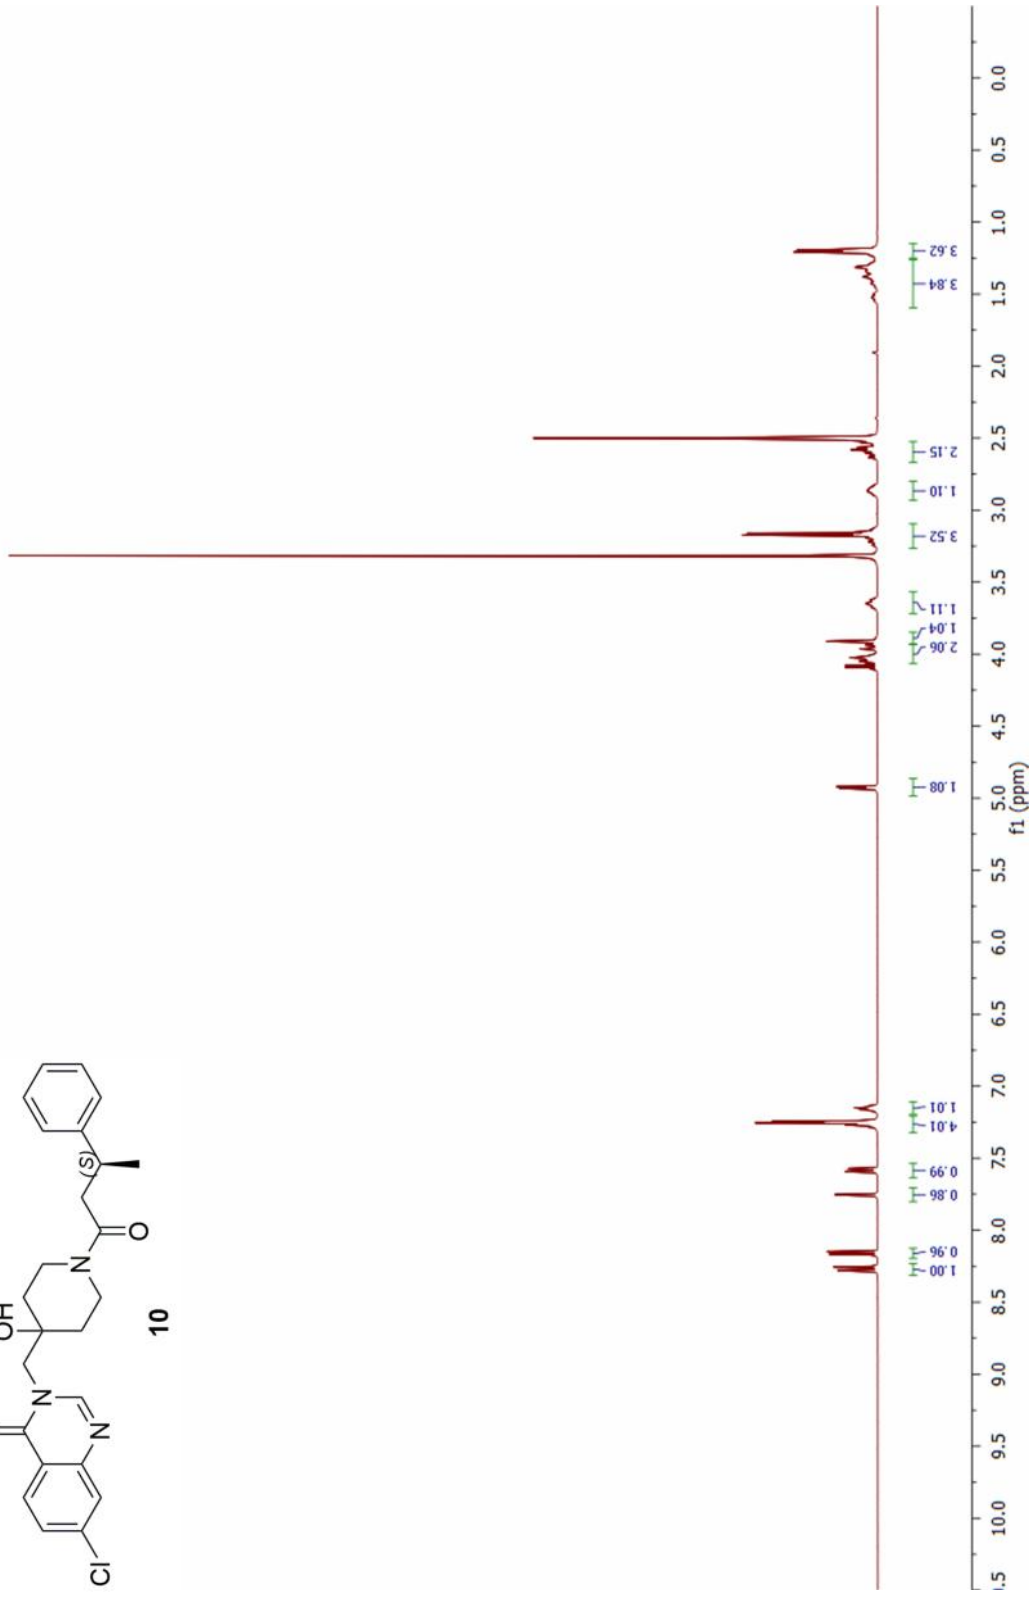

XL\_8599\_157L\_Product\_13C  
PI Last Name Buhrlage

168.89  
159.94  
159.88  
150.11  
148.74  
146.42  
146.30  
138.68  
128.20  
127.97  
127.94  
126.94  
126.66  
126.63  
125.98  
125.72  
125.67  
120.10

53.57  
40.82  
39.99  
36.67  
35.99  
35.77  
34.78  
34.64  
34.09  
33.95  
21.81  
21.61

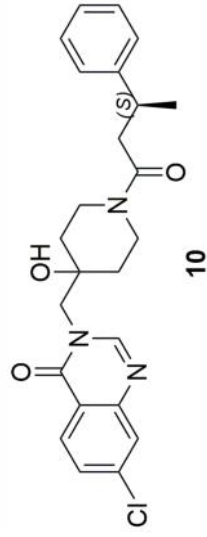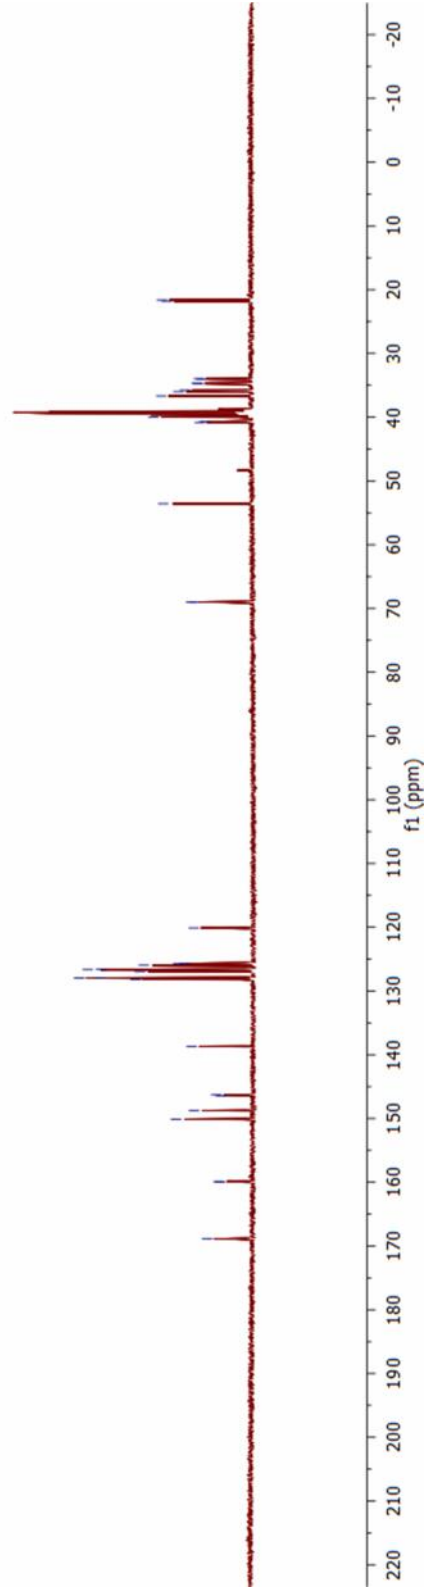

XL\_8599\_188\_Product\_1  
PI Last Name Buhrlage

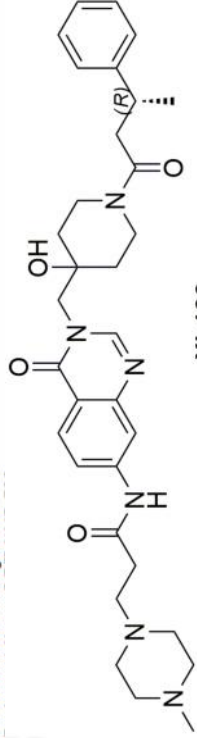

XL188

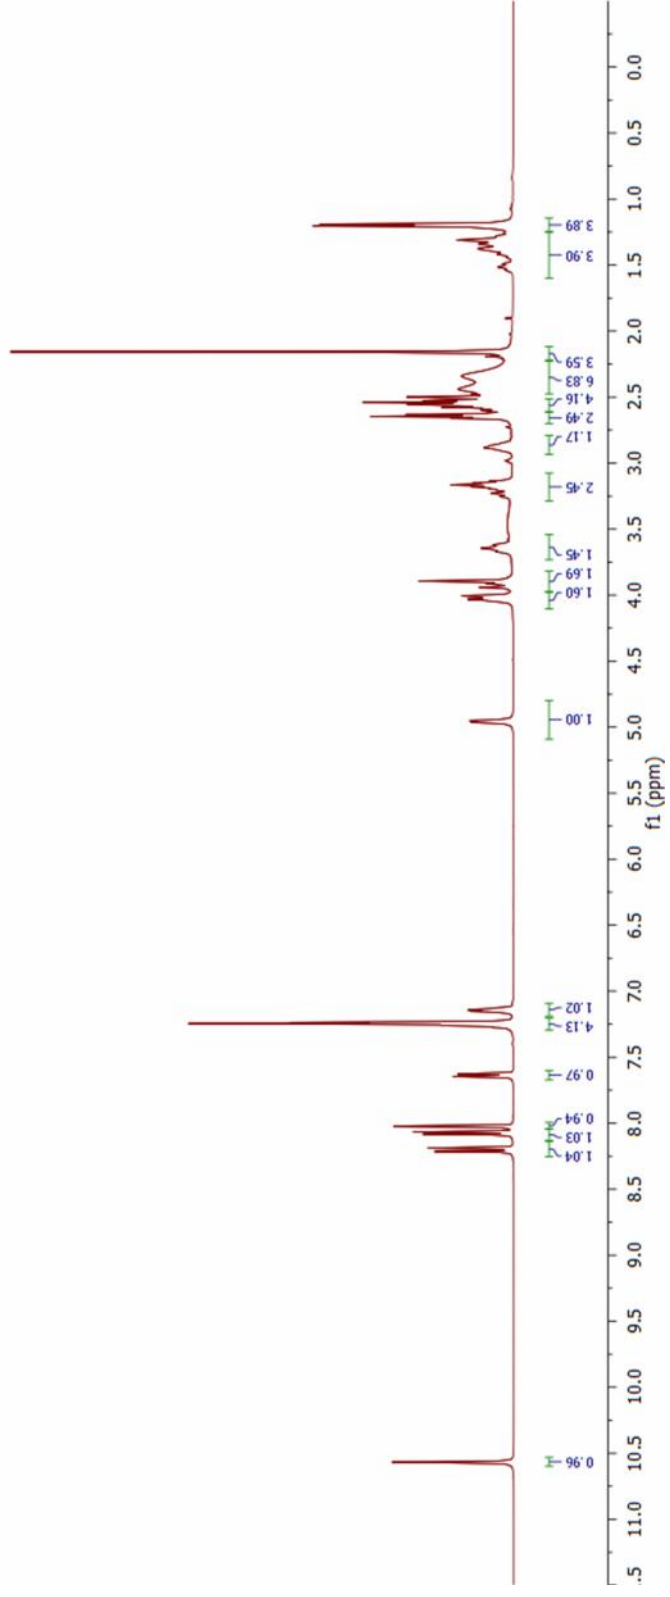



XL\_8599\_188\_Product\_1\_13C  
PI Last Name Buhrlage

170.76  
168.83  
159.92  
149.10  
148.73  
146.41  
146.28  
144.06  
127.93  
127.90  
126.97  
126.62  
126.60  
125.69  
118.04  
116.26  
114.45

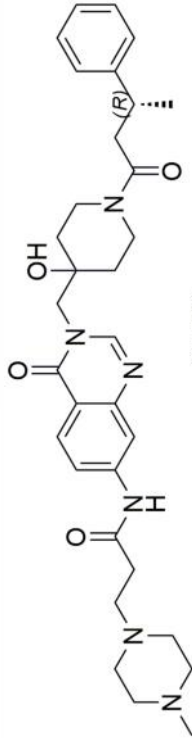

69.03  
54.37  
53.22  
51.96  
45.30  
40.81  
39.97  
36.67  
35.95  
35.74  
34.01  
33.95  
21.61

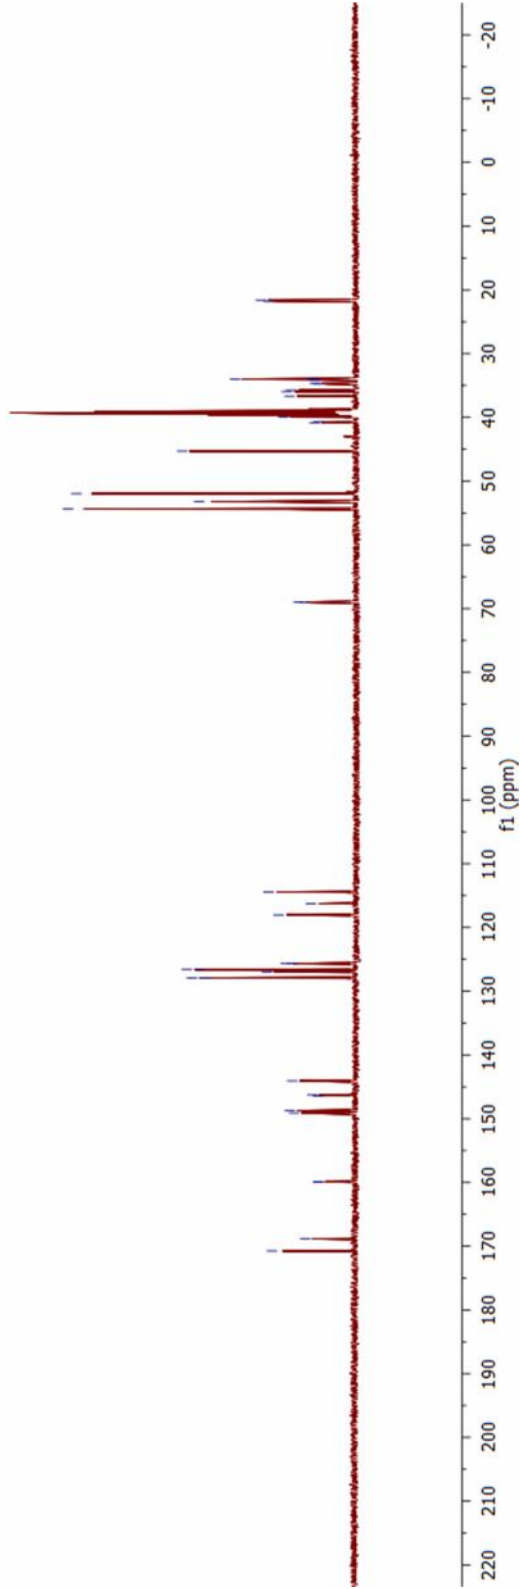

XL\_8599\_203C\_Product\_3  
PI Last Name Buhrlage

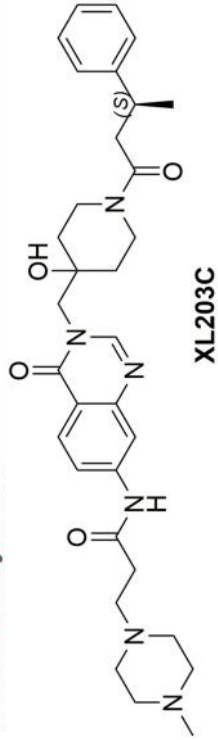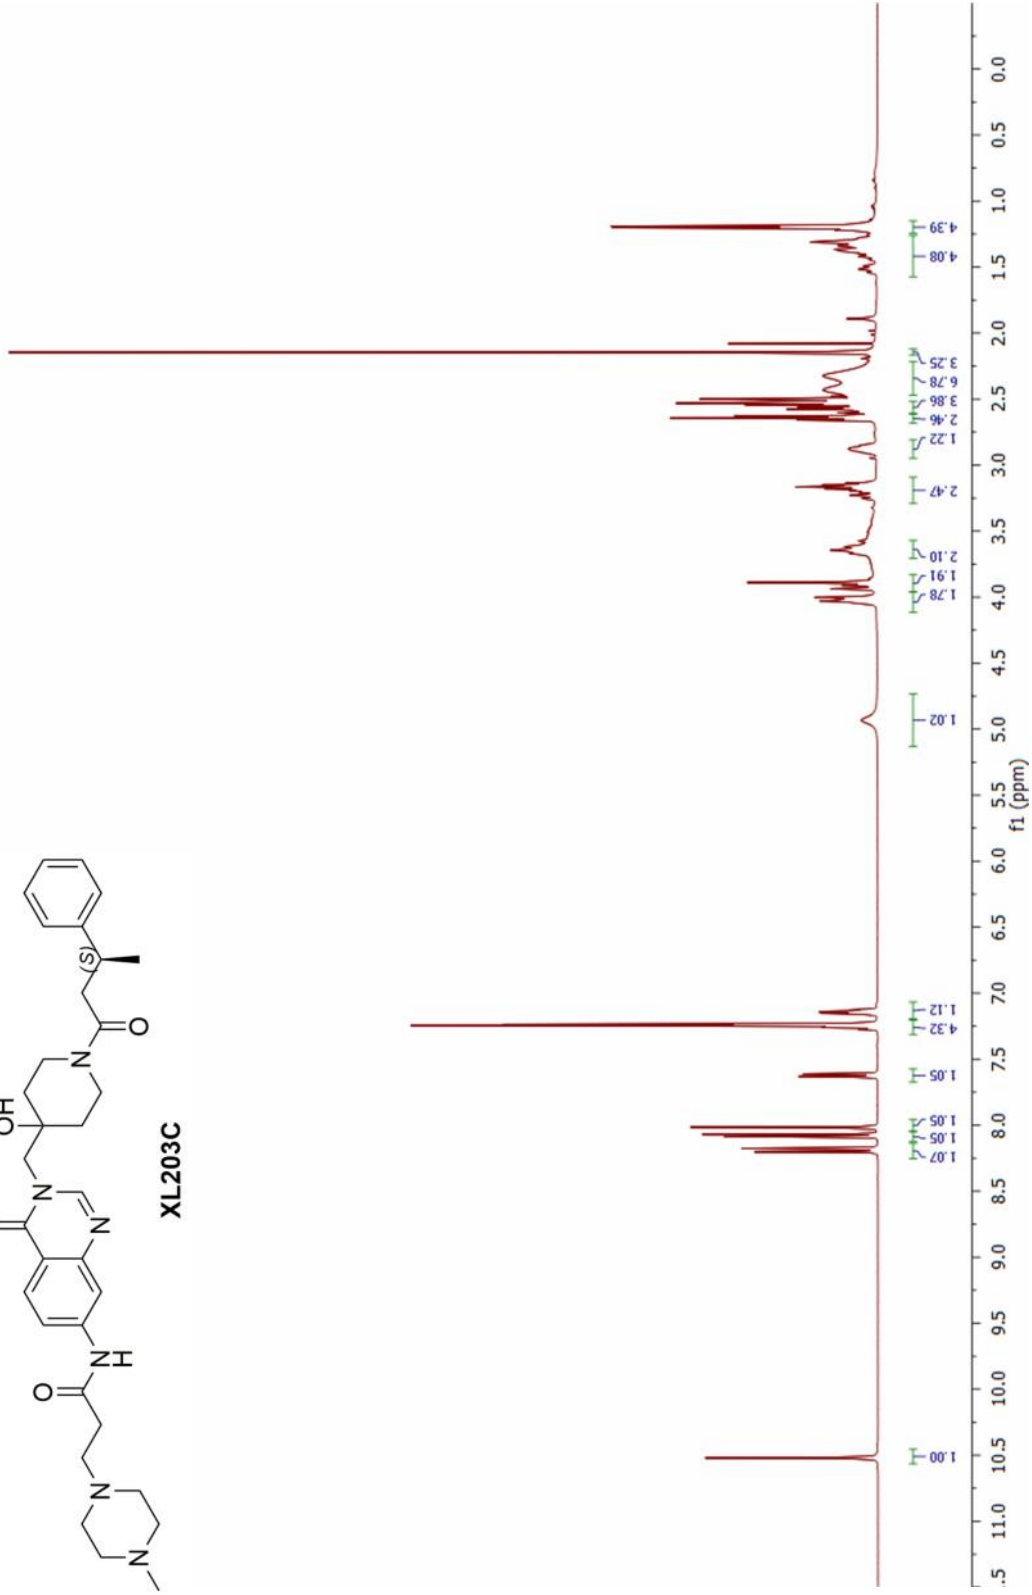

XL\_8599\_203C\_Product\_3\_13C  
PI Last Name Buhrlage

170.76  
168.82  
159.88  
149.11  
148.74  
146.41  
146.29  
144.04  
127.94  
127.91  
127.00  
126.63  
125.69  
125.64  
118.04  
116.28  
114.46

68.99  
54.43  
53.24  
52.02  
45.38  
40.82  
40.71  
39.96  
36.68  
35.96  
35.75  
34.83  
34.80  
21.61

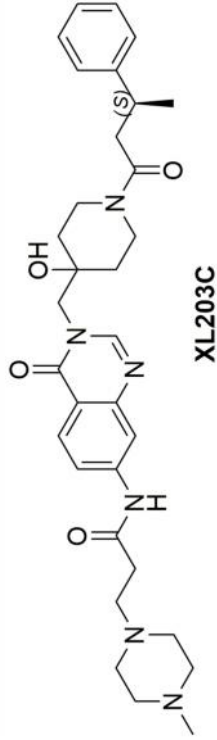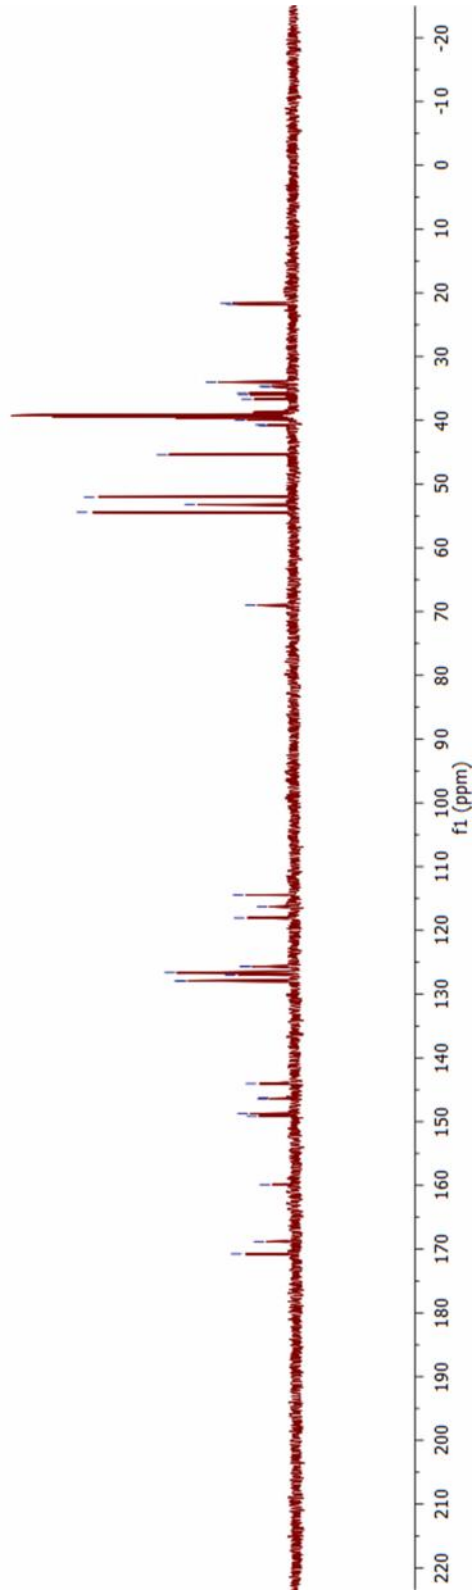

Supplement: NIHMS905392-supplement.pdf [file NIHMS905392-supplement.pdf]
